# Supplementary material
Source: publisher site journal article supplement (https://www.dovepress.com/article/supplementary_file/577209/577209%20Supplementary%20Tables.xlsx)
Supplement: Supplementary file 1 [file 577209%20Supplementary%20Tables.xlsx]

## Sheet: 1
	Table S1	Gene sets of the 28 immune cell subpopulations for evaluating immune infiltration via ssGSEA.
	Table S2	List of the 12 characteristic genes identified by intersecting DEGs, WGCNA module genes, and inflammatory cytokine-related genes.
	Table S3	GO function were enriched to 346 BP, 22 CC, 24 MF.
	Table S4	KEGG pathway were enriched to 7 pathway.
	Table S5	The four candidate hub genes selected for downstream analyses.
	Table S6	Predicted Drug–Target Interactions for CD19, RELB, IL12RB1, and RETN.
	Table S7	Leading-edge genes driving enrichment of the HSV-1 infection–related gene set

## Sheet: Table S1
Table S1. Gene sets of the 28 immune cell subpopulations for evaluating immune infiltration via ssGSEA.
Metagene	Cell type	Immunity
ADAM28	Activated B cell	Adaptive
CD180	Activated B cell	Adaptive
CD79B	Activated B cell	Adaptive
BLK	Activated B cell	Adaptive
CD19	Activated B cell	Adaptive
MS4A1	Activated B cell	Adaptive
TNFRSF17	Activated B cell	Adaptive
IGHM	Activated B cell	Adaptive
GNG7	Activated B cell	Adaptive
MICAL3	Activated B cell	Adaptive
SPIB	Activated B cell	Adaptive
HLA-DOB	Activated B cell	Adaptive
IGKC	Activated B cell	Adaptive
PNOC	Activated B cell	Adaptive
FCRL2	Activated B cell	Adaptive
BACH2	Activated B cell	Adaptive
CR2	Activated B cell	Adaptive
TCL1A	Activated B cell	Adaptive
AKNA	Activated B cell	Adaptive
ARHGAP25	Activated B cell	Adaptive
CCL21	Activated B cell	Adaptive
CD27	Activated B cell	Adaptive
CD38	Activated B cell	Adaptive
CLEC17A	Activated B cell	Adaptive
CLEC9A	Activated B cell	Adaptive
CLECL1	Activated B cell	Adaptive
AIM2	Activated CD4 T cell	Adaptive
BIRC3	Activated CD4 T cell	Adaptive
BRIP1	Activated CD4 T cell	Adaptive
CCL20	Activated CD4 T cell	Adaptive
CCL4	Activated CD4 T cell	Adaptive
CCL5	Activated CD4 T cell	Adaptive
CCNB1	Activated CD4 T cell	Adaptive
CCR7	Activated CD4 T cell	Adaptive
DUSP2	Activated CD4 T cell	Adaptive
ESCO2	Activated CD4 T cell	Adaptive
ETS1	Activated CD4 T cell	Adaptive
EXO1	Activated CD4 T cell	Adaptive
EXOC6	Activated CD4 T cell	Adaptive
IARS	Activated CD4 T cell	Adaptive
ITK	Activated CD4 T cell	Adaptive
KIF11	Activated CD4 T cell	Adaptive
KNTC1	Activated CD4 T cell	Adaptive
NUF2	Activated CD4 T cell	Adaptive
PRC1	Activated CD4 T cell	Adaptive
PSAT1	Activated CD4 T cell	Adaptive
RGS1	Activated CD4 T cell	Adaptive
RTKN2	Activated CD4 T cell	Adaptive
SAMSN1	Activated CD4 T cell	Adaptive
SELL	Activated CD4 T cell	Adaptive
TRAT1	Activated CD4 T cell	Adaptive
ADRM1	Activated CD8 T cell	Adaptive
AHSA1	Activated CD8 T cell	Adaptive
C1GALT1C1	Activated CD8 T cell	Adaptive
CCT6B	Activated CD8 T cell	Adaptive
CD37	Activated CD8 T cell	Adaptive
CD3D	Activated CD8 T cell	Adaptive
CD3E	Activated CD8 T cell	Adaptive
CD3G	Activated CD8 T cell	Adaptive
CD69	Activated CD8 T cell	Adaptive
CD8A	Activated CD8 T cell	Adaptive
CETN3	Activated CD8 T cell	Adaptive
CSE1L	Activated CD8 T cell	Adaptive
GEMIN6	Activated CD8 T cell	Adaptive
GNLY	Activated CD8 T cell	Adaptive
GPT2	Activated CD8 T cell	Adaptive
GZMA	Activated CD8 T cell	Adaptive
GZMH	Activated CD8 T cell	Adaptive
GZMK	Activated CD8 T cell	Adaptive
IL2RB	Activated CD8 T cell	Adaptive
LCK	Activated CD8 T cell	Adaptive
MPZL1	Activated CD8 T cell	Adaptive
NKG7	Activated CD8 T cell	Adaptive
PIK3IP1	Activated CD8 T cell	Adaptive
PTRH2	Activated CD8 T cell	Adaptive
TIMM13	Activated CD8 T cell	Adaptive
ZAP70	Activated CD8 T cell	Adaptive
ABHD3	Central memory CD4 T cell	Adaptive
AHNAK	Central memory CD4 T cell	Adaptive
ANXA2P2	Central memory CD4 T cell	Adaptive
AQP3	Central memory CD4 T cell	Adaptive
ATHL1	Central memory CD4 T cell	Adaptive
BMI1	Central memory CD4 T cell	Adaptive
BZW2	Central memory CD4 T cell	Adaptive
CD63	Central memory CD4 T cell	Adaptive
COL4A1	Central memory CD4 T cell	Adaptive
CYLD	Central memory CD4 T cell	Adaptive
ELMO2	Central memory CD4 T cell	Adaptive
FYN	Central memory CD4 T cell	Adaptive
GLIPR1	Central memory CD4 T cell	Adaptive
GSS	Central memory CD4 T cell	Adaptive
IFITM2	Central memory CD4 T cell	Adaptive
ITGB1	Central memory CD4 T cell	Adaptive
ITGB2	Central memory CD4 T cell	Adaptive
KLF5	Central memory CD4 T cell	Adaptive
LSP1	Central memory CD4 T cell	Adaptive
NDUFB9	Central memory CD4 T cell	Adaptive
PKM2	Central memory CD4 T cell	Adaptive
SFXN3	Central memory CD4 T cell	Adaptive
SIRPG	Central memory CD4 T cell	Adaptive
SMAD4	Central memory CD4 T cell	Adaptive
STX4	Central memory CD4 T cell	Adaptive
TRADD	Central memory CD4 T cell	Adaptive
VIM	Central memory CD4 T cell	Adaptive
XRCC6	Central memory CD4 T cell	Adaptive
ACTN4	Central memory CD8 T cell	Adaptive
ADAM12	Central memory CD8 T cell	Adaptive
ADCY9	Central memory CD8 T cell	Adaptive
F13A1	Central memory CD8 T cell	Adaptive
FCER1G	Central memory CD8 T cell	Adaptive
FCGR3B	Central memory CD8 T cell	Adaptive
FGF7	Central memory CD8 T cell	Adaptive
FKBP4	Central memory CD8 T cell	Adaptive
GLUD1	Central memory CD8 T cell	Adaptive
GM2A	Central memory CD8 T cell	Adaptive
GUSB	Central memory CD8 T cell	Adaptive
IL1RN	Central memory CD8 T cell	Adaptive
NOL11	Central memory CD8 T cell	Adaptive
NTRK1	Central memory CD8 T cell	Adaptive
RARA	Central memory CD8 T cell	Adaptive
RNF128	Central memory CD8 T cell	Adaptive
SIGLEC1	Central memory CD8 T cell	Adaptive
TNFRSF11A	Central memory CD8 T cell	Adaptive
TOX4	Central memory CD8 T cell	Adaptive
UBA52	Central memory CD8 T cell	Adaptive
ULBP1	Central memory CD8 T cell	Adaptive
ATM	Effector memeory CD4 T cell	Adaptive
CASP3	Effector memeory CD4 T cell	Adaptive
CASQ1	Effector memeory CD4 T cell	Adaptive
CD300E	Effector memeory CD4 T cell	Adaptive
DARS	Effector memeory CD4 T cell	Adaptive
DOCK9	Effector memeory CD4 T cell	Adaptive
EXOSC9	Effector memeory CD4 T cell	Adaptive
EZH2	Effector memeory CD4 T cell	Adaptive
GDE1	Effector memeory CD4 T cell	Adaptive
IL34	Effector memeory CD4 T cell	Adaptive
NCOA4	Effector memeory CD4 T cell	Adaptive
NEFL	Effector memeory CD4 T cell	Adaptive
PDGFRL	Effector memeory CD4 T cell	Adaptive
PTGS1	Effector memeory CD4 T cell	Adaptive
REPS1	Effector memeory CD4 T cell	Adaptive
SCG2	Effector memeory CD4 T cell	Adaptive
SDPR	Effector memeory CD4 T cell	Adaptive
SIGLEC14	Effector memeory CD4 T cell	Adaptive
SIGLEC6	Effector memeory CD4 T cell	Adaptive
TAL1	Effector memeory CD4 T cell	Adaptive
TFEC	Effector memeory CD4 T cell	Adaptive
TIPIN	Effector memeory CD4 T cell	Adaptive
TPK1	Effector memeory CD4 T cell	Adaptive
UQCRB	Effector memeory CD4 T cell	Adaptive
USP9Y	Effector memeory CD4 T cell	Adaptive
WIPF1	Effector memeory CD4 T cell	Adaptive
ZCRB1	Effector memeory CD4 T cell	Adaptive
ACAP1	Effector memeory CD8 T cell	Adaptive
APOL3	Effector memeory CD8 T cell	Adaptive
ARHGAP10	Effector memeory CD8 T cell	Adaptive
ATP10D	Effector memeory CD8 T cell	Adaptive
C3AR1	Effector memeory CD8 T cell	Adaptive
CCR5	Effector memeory CD8 T cell	Adaptive
CD160	Effector memeory CD8 T cell	Adaptive
CD55	Effector memeory CD8 T cell	Adaptive
CFLAR	Effector memeory CD8 T cell	Adaptive
CMKLR1	Effector memeory CD8 T cell	Adaptive
DAPP1	Effector memeory CD8 T cell	Adaptive
FCRL6	Effector memeory CD8 T cell	Adaptive
FLT3LG	Effector memeory CD8 T cell	Adaptive
GZMM	Effector memeory CD8 T cell	Adaptive
HAPLN3	Effector memeory CD8 T cell	Adaptive
HLA-DMB	Effector memeory CD8 T cell	Adaptive
HLA-DPA1	Effector memeory CD8 T cell	Adaptive
HLA-DPB1	Effector memeory CD8 T cell	Adaptive
IFI16	Effector memeory CD8 T cell	Adaptive
LIME1	Effector memeory CD8 T cell	Adaptive
LTK	Effector memeory CD8 T cell	Adaptive
NFKBIA	Effector memeory CD8 T cell	Adaptive
SETD7	Effector memeory CD8 T cell	Adaptive
SIK1	Effector memeory CD8 T cell	Adaptive
TRIB2	Effector memeory CD8 T cell	Adaptive
ACP5	Gamma delta T cell	Adaptive
AQP9	Gamma delta T cell	Adaptive
BTN3A2	Gamma delta T cell	Adaptive
C1orf54	Gamma delta T cell	Adaptive
CARD8	Gamma delta T cell	Adaptive
CCL18	Gamma delta T cell	Adaptive
CD209	Gamma delta T cell	Adaptive
CD33	Gamma delta T cell	Adaptive
CD36	Gamma delta T cell	Adaptive
CDK5	Gamma delta T cell	Adaptive
IL10RB	Gamma delta T cell	Adaptive
KLRF1	Gamma delta T cell	Adaptive
LGALS1	Gamma delta T cell	Adaptive
MAPK7	Gamma delta T cell	Adaptive
KLHL7	Gamma delta T cell	Adaptive
KRT80	Gamma delta T cell	Adaptive
LAMC1	Gamma delta T cell	Adaptive
LCORL	Gamma delta T cell	Adaptive
LMNB1	Gamma delta T cell	Adaptive
MEIS3P1	Gamma delta T cell	Adaptive
MPL	Gamma delta T cell	Adaptive
FABP1	Gamma delta T cell	Adaptive
FABP5	Gamma delta T cell	Adaptive
FADD	Gamma delta T cell	Adaptive
MFAP3L	Gamma delta T cell	Adaptive
MINPP1	Gamma delta T cell	Adaptive
RPS24	Gamma delta T cell	Adaptive
RPS7	Gamma delta T cell	Adaptive
RPS9	Gamma delta T cell	Adaptive
DBNL	Gamma delta T cell	Adaptive
CCL13	Gamma delta T cell	Adaptive
CD22	Immature B cell	Adaptive
CYBB	Immature B cell	Adaptive
FAM129C	Immature B cell	Adaptive
FCRL1	Immature B cell	Adaptive
FCRL3	Immature B cell	Adaptive
FCRL5	Immature B cell	Adaptive
FCRLA	Immature B cell	Adaptive
HDAC9	Immature B cell	Adaptive
HLA-DQA1	Immature B cell	Adaptive
HVCN1	Immature B cell	Adaptive
KIAA0226	Immature B cell	Adaptive
NCF1	Immature B cell	Adaptive
NCF1B	Immature B cell	Adaptive
P2RY10	Immature B cell	Adaptive
SP100	Immature B cell	Adaptive
TXNIP	Immature B cell	Adaptive
STAP1	Immature B cell	Adaptive
TAGAP	Immature B cell	Adaptive
ZCCHC2	Immature B cell	Adaptive
AICDA	Memory B cell	Adaptive
CCNA2	Memory B cell	Adaptive
CDKN3	Memory B cell	Adaptive
CLCN5	Memory B cell	Adaptive
ENPP1	Memory B cell	Adaptive
FCER1A	Memory B cell	Adaptive
FCRL4	Memory B cell	Adaptive
MYC	Memory B cell	Adaptive
RUNX2	Memory B cell	Adaptive
SORL1	Memory B cell	Adaptive
SOX5	Memory B cell	Adaptive
STAT5A	Memory B cell	Adaptive
STAT5B	Memory B cell	Adaptive
TLR9	Memory B cell	Adaptive
CCL3L1	Regulatory T cell	Adaptive
CD72	Regulatory T cell	Adaptive
CLEC5A	Regulatory T cell	Adaptive
FOXP3	Regulatory T cell	Adaptive
ITGA4	Regulatory T cell	Adaptive
L1CAM	Regulatory T cell	Adaptive
LIPA	Regulatory T cell	Adaptive
LRP1	Regulatory T cell	Adaptive
LRRC42	Regulatory T cell	Adaptive
MARCO	Regulatory T cell	Adaptive
MMP12	Regulatory T cell	Adaptive
MNDA	Regulatory T cell	Adaptive
MRC1	Regulatory T cell	Adaptive
MS4A6A	Regulatory T cell	Adaptive
PELO	Regulatory T cell	Adaptive
PLEK	Regulatory T cell	Adaptive
PRSS23	Regulatory T cell	Adaptive
PTGIR	Regulatory T cell	Adaptive
ST8SIA4	Regulatory T cell	Adaptive
STAB1	Regulatory T cell	Adaptive
B3GAT1	T follicular helper cell	Adaptive
CDK5R1	T follicular helper cell	Adaptive
PDCD1	T follicular helper cell	Adaptive
BCL6	T follicular helper cell	Adaptive
CD200	T follicular helper cell	Adaptive
CD83	T follicular helper cell	Adaptive
CD84	T follicular helper cell	Adaptive
FGF2	T follicular helper cell	Adaptive
GPR18	T follicular helper cell	Adaptive
CEBPA	T follicular helper cell	Adaptive
CECR1	T follicular helper cell	Adaptive
CLEC10A	T follicular helper cell	Adaptive
CLEC4A	T follicular helper cell	Adaptive
CSF1R	T follicular helper cell	Adaptive
CTSS	T follicular helper cell	Adaptive
DMN	T follicular helper cell	Adaptive
DPP4	T follicular helper cell	Adaptive
LRRC32	T follicular helper cell	Adaptive
MC5R	T follicular helper cell	Adaptive
MICA	T follicular helper cell	Adaptive
NCAM1	T follicular helper cell	Adaptive
NCR2	T follicular helper cell	Adaptive
NRP1	T follicular helper cell	Adaptive
PDCD1LG2	T follicular helper cell	Adaptive
PDCD6	T follicular helper cell	Adaptive
PRDX1	T follicular helper cell	Adaptive
RAE1	T follicular helper cell	Adaptive
RAET1E	T follicular helper cell	Adaptive
SIGLEC7	T follicular helper cell	Adaptive
SIGLEC9	T follicular helper cell	Adaptive
TYRO3	T follicular helper cell	Adaptive
CHST12	T follicular helper cell	Adaptive
CLIC3	T follicular helper cell	Adaptive
IVNS1ABP	T follicular helper cell	Adaptive
KIR2DL2	T follicular helper cell	Adaptive
LGMN	T follicular helper cell	Adaptive
CD70	Type 1 T helper cell	Adaptive
TBX21	Type 1 T helper cell	Adaptive
ADAM8	Type 1 T helper cell	Adaptive
AHCYL2	Type 1 T helper cell	Adaptive
ALCAM	Type 1 T helper cell	Adaptive
B3GALNT1	Type 1 T helper cell	Adaptive
BBS12	Type 1 T helper cell	Adaptive
BST1	Type 1 T helper cell	Adaptive
CD151	Type 1 T helper cell	Adaptive
CD47	Type 1 T helper cell	Adaptive
CD48	Type 1 T helper cell	Adaptive
CD52	Type 1 T helper cell	Adaptive
CD53	Type 1 T helper cell	Adaptive
CD59	Type 1 T helper cell	Adaptive
CD6	Type 1 T helper cell	Adaptive
CD68	Type 1 T helper cell	Adaptive
CD7	Type 1 T helper cell	Adaptive
CD96	Type 1 T helper cell	Adaptive
CFHR3	Type 1 T helper cell	Adaptive
CHRM3	Type 1 T helper cell	Adaptive
CLEC7A	Type 1 T helper cell	Adaptive
COL23A1	Type 1 T helper cell	Adaptive
COL4A4	Type 1 T helper cell	Adaptive
COL5A3	Type 1 T helper cell	Adaptive
DAB1	Type 1 T helper cell	Adaptive
DLEU7	Type 1 T helper cell	Adaptive
DOC2B	Type 1 T helper cell	Adaptive
EMP1	Type 1 T helper cell	Adaptive
F12	Type 1 T helper cell	Adaptive
FURIN	Type 1 T helper cell	Adaptive
GAB3	Type 1 T helper cell	Adaptive
GATM	Type 1 T helper cell	Adaptive
GFPT2	Type 1 T helper cell	Adaptive
GPR25	Type 1 T helper cell	Adaptive
GREM2	Type 1 T helper cell	Adaptive
HAVCR1	Type 1 T helper cell	Adaptive
HSD11B1	Type 1 T helper cell	Adaptive
HUNK	Type 1 T helper cell	Adaptive
IGF2	Type 1 T helper cell	Adaptive
RCSD1	Type 1 T helper cell	Adaptive
RYR1	Type 1 T helper cell	Adaptive
SAV1	Type 1 T helper cell	Adaptive
SELE	Type 1 T helper cell	Adaptive
SELP	Type 1 T helper cell	Adaptive
SH3KBP1	Type 1 T helper cell	Adaptive
SIT1	Type 1 T helper cell	Adaptive
SLC35B3	Type 1 T helper cell	Adaptive
SIGLEC10	Type 1 T helper cell	Adaptive
SKAP1	Type 1 T helper cell	Adaptive
THUMPD2	Type 1 T helper cell	Adaptive
TIGIT	Type 1 T helper cell	Adaptive
ZEB2	Type 1 T helper cell	Adaptive
ENC1	Type 1 T helper cell	Adaptive
FAM134B	Type 1 T helper cell	Adaptive
FBXO30	Type 1 T helper cell	Adaptive
FCGR2C	Type 1 T helper cell	Adaptive
STAC	Type 1 T helper cell	Adaptive
LTC4S	Type 1 T helper cell	Adaptive
MAN1B1	Type 1 T helper cell	Adaptive
MDH1	Type 1 T helper cell	Adaptive
MMD	Type 1 T helper cell	Adaptive
RGS16	Type 1 T helper cell	Adaptive
IL12A	Type 1 T helper cell	Adaptive
P2RX5	Type 1 T helper cell	Adaptive
CD97	Type 1 T helper cell	Adaptive
ITGB4	Type 1 T helper cell	Adaptive
ICAM3	Type 1 T helper cell	Adaptive
METRNL	Type 1 T helper cell	Adaptive
TNFRSF1A	Type 1 T helper cell	Adaptive
IRF1	Type 1 T helper cell	Adaptive
HTR2B	Type 1 T helper cell	Adaptive
CALD1	Type 1 T helper cell	Adaptive
MOCOS	Type 1 T helper cell	Adaptive
TRAF3IP2	Type 1 T helper cell	Adaptive
TLR8	Type 1 T helper cell	Adaptive
TRAF1	Type 1 T helper cell	Adaptive
DUSP14	Type 1 T helper cell	Adaptive
IL17A	Type 17 T helper cell	Adaptive
IL17RA	Type 17 T helper cell	Adaptive
C2CD4A	Type 17 T helper cell	Adaptive
C2CD4B	Type 17 T helper cell	Adaptive
CA2	Type 17 T helper cell	Adaptive
CCDC65	Type 17 T helper cell	Adaptive
CEACAM3	Type 17 T helper cell	Adaptive
IL17C	Type 17 T helper cell	Adaptive
IL17F	Type 17 T helper cell	Adaptive
IL17RC	Type 17 T helper cell	Adaptive
IL17RE	Type 17 T helper cell	Adaptive
IL23A	Type 17 T helper cell	Adaptive
ILDR1	Type 17 T helper cell	Adaptive
LONRF3	Type 17 T helper cell	Adaptive
SH2D6	Type 17 T helper cell	Adaptive
TNIP2	Type 17 T helper cell	Adaptive
ABCA1	Type 17 T helper cell	Adaptive
ABCB1	Type 17 T helper cell	Adaptive
ADAMTS12	Type 17 T helper cell	Adaptive
ANK1	Type 17 T helper cell	Adaptive
ANKRD22	Type 17 T helper cell	Adaptive
B3GALT2	Type 17 T helper cell	Adaptive
CAMTA1	Type 17 T helper cell	Adaptive
CCR9	Type 17 T helper cell	Adaptive
CD40	Type 17 T helper cell	Adaptive
GPR44	Type 17 T helper cell	Adaptive
IFT80	Type 17 T helper cell	Adaptive
ASB2	Type 2 T helper cell	Adaptive
CSRP2	Type 2 T helper cell	Adaptive
DAPK1	Type 2 T helper cell	Adaptive
DLC1	Type 2 T helper cell	Adaptive
DNAJC12	Type 2 T helper cell	Adaptive
DUSP6	Type 2 T helper cell	Adaptive
GNAI1	Type 2 T helper cell	Adaptive
LAMP3	Type 2 T helper cell	Adaptive
NRP2	Type 2 T helper cell	Adaptive
OSBPL1A	Type 2 T helper cell	Adaptive
PDE4B	Type 2 T helper cell	Adaptive
PHLDA1	Type 2 T helper cell	Adaptive
PLA2G4A	Type 2 T helper cell	Adaptive
RAB27B	Type 2 T helper cell	Adaptive
RBMS3	Type 2 T helper cell	Adaptive
RNF125	Type 2 T helper cell	Adaptive
TMPRSS3	Type 2 T helper cell	Adaptive
GATA3	Type 2 T helper cell	Adaptive
BIRC5	Type 2 T helper cell	Adaptive
CDC25C	Type 2 T helper cell	Adaptive
CDC7	Type 2 T helper cell	Adaptive
CENPF	Type 2 T helper cell	Adaptive
CXCR6	Type 2 T helper cell	Adaptive
DHFR	Type 2 T helper cell	Adaptive
EVI5	Type 2 T helper cell	Adaptive
GSTA4	Type 2 T helper cell	Adaptive
HELLS	Type 2 T helper cell	Adaptive
IL26	Type 2 T helper cell	Adaptive
LAIR2	Type 2 T helper cell	Adaptive
ABCD1	Activated dendritic cell	Innate
C1QC	Activated dendritic cell	Innate
CAPG	Activated dendritic cell	Innate
CCL3L3	Activated dendritic cell	Innate
CD207	Activated dendritic cell	Innate
CD302	Activated dendritic cell	Innate
ATP5B	Activated dendritic cell	Innate
ATP5L	Activated dendritic cell	Innate
ATP6V1A	Activated dendritic cell	Innate
BCL2L1	Activated dendritic cell	Innate
C1QB	Activated dendritic cell	Innate
SNURF	Activated dendritic cell	Innate
SPCS3	Activated dendritic cell	Innate
CCNA1	Activated dendritic cell	Innate
CEACAM8	Activated dendritic cell	Innate
NOS2	Activated dendritic cell	Innate
SRA1	Activated dendritic cell	Innate
TNFRSF6B	Activated dendritic cell	Innate
TREM1	Activated dendritic cell	Innate
TREML1	Activated dendritic cell	Innate
RHOA	Activated dendritic cell	Innate
SLC25A37	Activated dendritic cell	Innate
TNFSF14	Activated dendritic cell	Innate
TREML4	Activated dendritic cell	Innate
VNN2	Activated dendritic cell	Innate
XPO6	Activated dendritic cell	Innate
CLEC4C	Activated dendritic cell	Innate
TNFAIP2	Activated dendritic cell	Innate
UBD	Activated dendritic cell	Innate
ACTR3	Activated dendritic cell	Innate
RAB1A	Activated dendritic cell	Innate
SLA	Activated dendritic cell	Innate
HLA-DQA2	Activated dendritic cell	Innate
SIGLEC5	Activated dendritic cell	Innate
SLAMF9	Activated dendritic cell	Innate
ABAT	CD56bright natural killer cell	Innate
C11orf75	CD56bright natural killer cell	Innate
C5orf15	CD56bright natural killer cell	Innate
CDHR1	CD56bright natural killer cell	Innate
DCAF12	CD56bright natural killer cell	Innate
DYNLL1	CD56bright natural killer cell	Innate
GPR137B	CD56bright natural killer cell	Innate
HCP5	CD56bright natural killer cell	Innate
HDGFRP2	CD56bright natural killer cell	Innate
KRT86	CD56bright natural killer cell	Innate
MLST8	CD56bright natural killer cell	Innate
ELMOD3	CD56bright natural killer cell	Innate
ENTPD5	CD56bright natural killer cell	Innate
FAM119A	CD56bright natural killer cell	Innate
FAM179A	CD56bright natural killer cell	Innate
CLIC2	CD56bright natural killer cell	Innate
COX7A2L	CD56bright natural killer cell	Innate
CREB3L4	CD56bright natural killer cell	Innate
CSF1	CD56bright natural killer cell	Innate
CSNK2A2	CD56bright natural killer cell	Innate
CSTA	CD56bright natural killer cell	Innate
CSTB	CD56bright natural killer cell	Innate
CTPS	CD56bright natural killer cell	Innate
CTSD	CD56bright natural killer cell	Innate
FST	CD56bright natural killer cell	Innate
GATA2	CD56bright natural killer cell	Innate
GMPR	CD56bright natural killer cell	Innate
HDC	CD56bright natural killer cell	Innate
HEY1	CD56bright natural killer cell	Innate
HOXA1	CD56bright natural killer cell	Innate
HS2ST1	CD56bright natural killer cell	Innate
HS3ST1	CD56bright natural killer cell	Innate
BCL11B	CD56bright natural killer cell	Innate
CDH3	CD56bright natural killer cell	Innate
MYL6B	CD56bright natural killer cell	Innate
NAA16	CD56bright natural killer cell	Innate
ClQA	CD56bright natural killer cell	Innate
ClQB	CD56bright natural killer cell	Innate
CYP27B1	CD56bright natural killer cell	Innate
EIF3M	CD56bright natural killer cell	Innate
CYP27A1	CD56dim natural killer cell	Innate
DDX55	CD56dim natural killer cell	Innate
DYRK2	CD56dim natural killer cell	Innate
RPL37A	CD56dim natural killer cell	Innate
NOTCH3	CD56dim natural killer cell	Innate
AKR7A3	CD56dim natural killer cell	Innate
GPRC5C	CD56dim natural killer cell	Innate
GRIN1	CD56dim natural killer cell	Innate
HLA-E	CD56dim natural killer cell	Innate
PORCN	CD56dim natural killer cell	Innate
PSMC4	CD56dim natural killer cell	Innate
UPP1	CD56dim natural killer cell	Innate
IL21R	CD56dim natural killer cell	Innate
KIR2DS1	CD56dim natural killer cell	Innate
KIR2DS2	CD56dim natural killer cell	Innate
KIR2DS5	CD56dim natural killer cell	Innate
GIPR	Eosinophil	Innate
KRT18P50	Eosinophil	Innate
LRMP	Eosinophil	Innate
FOSB	Eosinophil	Innate
RRP12	Eosinophil	Innate
GPR183	Eosinophil	Innate
NR4A3	Eosinophil	Innate
ST3GAL6	Eosinophil	Innate
DEPDC5	Eosinophil	Innate
PDE6C	Eosinophil	Innate
PKD2L2	Eosinophil	Innate
GPR65	Eosinophil	Innate
IL5RA	Eosinophil	Innate
P2RY14	Eosinophil	Innate
DACH1	Eosinophil	Innate
DAPK2	Eosinophil	Innate
EMR3	Eosinophil	Innate
ACADM	Immature dendritic cell	Innate
AHCYL1	Immature dendritic cell	Innate
ALDH1A2	Immature dendritic cell	Innate
ALDH3A2	Immature dendritic cell	Innate
ALDH9A1	Immature dendritic cell	Innate
ALOX15	Immature dendritic cell	Innate
AMT	Immature dendritic cell	Innate
ARL1	Immature dendritic cell	Innate
ATIC	Immature dendritic cell	Innate
ATP5A1	Immature dendritic cell	Innate
CAPZA1	Immature dendritic cell	Innate
LILRA5	Immature dendritic cell	Innate
RDX	Immature dendritic cell	Innate
RRAGD	Immature dendritic cell	Innate
TACSTD2	Immature dendritic cell	Innate
INPP5F	Immature dendritic cell	Innate
RAB38	Immature dendritic cell	Innate
PLAU	Immature dendritic cell	Innate
CSF3R	Immature dendritic cell	Innate
SLC18A2	Immature dendritic cell	Innate
AMPD2	Immature dendritic cell	Innate
CLTB	Immature dendritic cell	Innate
C1orf162	Immature dendritic cell	Innate
AIF1	Macrophage	Innate
CCL1	Macrophage	Innate
CCL14	Macrophage	Innate
CCL23	Macrophage	Innate
CCL26	Macrophage	Innate
CD300LB	Macrophage	Innate
CNR1	Macrophage	Innate
CNR2	Macrophage	Innate
EIF1	Macrophage	Innate
EIF4A1	Macrophage	Innate
FPR1	Macrophage	Innate
FPR2	Macrophage	Innate
FRAT2	Macrophage	Innate
GPR27	Macrophage	Innate
GPR77	Macrophage	Innate
RNASE2	Macrophage	Innate
MS4A2	Macrophage	Innate
BASP1	Macrophage	Innate
IGSF6	Macrophage	Innate
HK3	Macrophage	Innate
VNN1	Macrophage	Innate
FES	Macrophage	Innate
NPL	Macrophage	Innate
FZD2	Macrophage	Innate
FAM198B	Macrophage	Innate
HNMT	Macrophage	Innate
SLC15A3	Macrophage	Innate
CD4	Macrophage	Innate
TXNDC3	Macrophage	Innate
FRMD4A	Macrophage	Innate
CRYBB1	Macrophage	Innate
HRH1	Macrophage	Innate
WNT5B	Macrophage	Innate
ADAMTS3	Mast cell	Innate
CPA3	Mast cell	Innate
CMA1	Mast cell	Innate
CTSG	Mast cell	Innate
ARHGAP15	Mast cell	Innate
CPM	Mast cell	Innate
FCN1	Mast cell	Innate
FTL	Mast cell	Innate
HSPA6	Mast cell	Innate
ITGA9	Mast cell	Innate
RNASE3	Mast cell	Innate
S100A4	Mast cell	Innate
SIGLEC8	Mast cell	Innate
SLC6A4	Mast cell	Innate
PTGS2	Mast cell	Innate
EGR3	Mast cell	Innate
PILRA	Mast cell	Innate
CCR2	MDSC	Innate
CD14	MDSC	Innate
CD2	MDSC	Innate
CD86	MDSC	Innate
CXCR4	MDSC	Innate
FCGR2A	MDSC	Innate
FCGR2B	MDSC	Innate
FCGR3A	MDSC	Innate
FERMT3	MDSC	Innate
GPSM3	MDSC	Innate
IL18BP	MDSC	Innate
IL4R	MDSC	Innate
ITGAL	MDSC	Innate
ITGAM	MDSC	Innate
PARVG	MDSC	Innate
PSAP	MDSC	Innate
PTGER2	MDSC	Innate
PTGES2	MDSC	Innate
S100A8	MDSC	Innate
S100A9	MDSC	Innate
ASGR2	Monocyte	Innate
CFP	Monocyte	Innate
ASGR1	Monocyte	Innate
CD1D	Monocyte	Innate
UPK3A	Monocyte	Innate
ACTG1	Monocyte	Innate
ANXA5	Monocyte	Innate
ATP6V1B2	Monocyte	Innate
CFL1	Monocyte	Innate
DAZAP2	Monocyte	Innate
CTBS	Monocyte	Innate
EMR4P	Monocyte	Innate
HIVEP2	Monocyte	Innate
MARCKSL1	Monocyte	Innate
MBP	Monocyte	Innate
MMP15	Monocyte	Innate
PNPLA6	Monocyte	Innate
TMBIM6	Monocyte	Innate
PQBP1	Monocyte	Innate
TEX264	Monocyte	Innate
IKZF1	Monocyte	Innate
AKT3	Natural killer cell	Innate
AXL	Natural killer cell	Innate
BST2	Natural killer cell	Innate
CDH2	Natural killer cell	Innate
CRTAM	Natural killer cell	Innate
CSF2RA	Natural killer cell	Innate
CTSZ	Natural killer cell	Innate
CXCL1	Natural killer cell	Innate
CYTH1	Natural killer cell	Innate
DAXX	Natural killer cell	Innate
DGKH	Natural killer cell	Innate
DLL4	Natural killer cell	Innate
DPYD	Natural killer cell	Innate
ERBB3	Natural killer cell	Innate
F11R	Natural killer cell	Innate
FAM27A	Natural killer cell	Innate
FAM49A	Natural killer cell	Innate
FASLG	Natural killer cell	Innate
FCGR1A	Natural killer cell	Innate
FN1	Natural killer cell	Innate
FSTL1	Natural killer cell	Innate
FUCA1	Natural killer cell	Innate
GBP3	Natural killer cell	Innate
GLS2	Natural killer cell	Innate
GRB2	Natural killer cell	Innate
LST1	Natural killer cell	Innate
BCL2	Natural killer cell	Innate
CDC5L	Natural killer cell	Innate
FGF18	Natural killer cell	Innate
FUT5	Natural killer cell	Innate
FZR1	Natural killer cell	Innate
GAGE2	Natural killer cell	Innate
IGFBP5	Natural killer cell	Innate
KANK2	Natural killer cell	Innate
LDB3	Natural killer cell	Innate
BTN2A2	Natural killer T cell	Innate
CD101	Natural killer T cell	Innate
CD109	Natural killer T cell	Innate
CNPY3	Natural killer T cell	Innate
CNPY4	Natural killer T cell	Innate
CREB1	Natural killer T cell	Innate
CRTC2	Natural killer T cell	Innate
CRTC3	Natural killer T cell	Innate
CSF2	Natural killer T cell	Innate
KLRC1	Natural killer T cell	Innate
FUT4	Natural killer T cell	Innate
ICAM2	Natural killer T cell	Innate
IL32	Natural killer T cell	Innate
LAMP2	Natural killer T cell	Innate
LILRB5	Natural killer T cell	Innate
KLRG1	Natural killer T cell	Innate
HSPA4	Natural killer T cell	Innate
HSPB6	Natural killer T cell	Innate
ISM2	Natural killer T cell	Innate
ITIH2	Natural killer T cell	Innate
KDM4C	Natural killer T cell	Innate
KIR2DS4	Natural killer T cell	Innate
KIRREL3	Natural killer T cell	Innate
SDCBP	Natural killer T cell	Innate
NFATC2IP	Natural killer T cell	Innate
MICB	Natural killer T cell	Innate
KIR2DL1	Natural killer T cell	Innate
KIR2DL3	Natural killer T cell	Innate
KIR3DL1	Natural killer T cell	Innate
KIR3DL2	Natural killer T cell	Innate
NCR1	Natural killer T cell	Innate
FOSL1	Natural killer T cell	Innate
TSLP	Natural killer T cell	Innate
SLC7A7	Natural killer T cell	Innate
SPP1	Natural killer T cell	Innate
TREM2	Natural killer T cell	Innate
UBASH3A	Natural killer T cell	Innate
YBX2	Natural killer T cell	Innate
CCDC88A	Natural killer T cell	Innate
CLEC1A	Natural killer T cell	Innate
THBD	Natural killer T cell	Innate
PDPN	Natural killer T cell	Innate
VCAM1	Natural killer T cell	Innate
EMR1	Natural killer T cell	Innate
CREB5	Neutrophil	Innate
CDA	Neutrophil	Innate
CHST15	Neutrophil	Innate
S100A12	Neutrophil	Innate
APOBEC3A	Neutrophil	Innate
CASP5	Neutrophil	Innate
MMP25	Neutrophil	Innate
HAL	Neutrophil	Innate
C1orf183	Neutrophil	Innate
FFAR2	Neutrophil	Innate
MAK	Neutrophil	Innate
CXCR1	Neutrophil	Innate
STEAP4	Neutrophil	Innate
MGAM	Neutrophil	Innate
BTNL8	Neutrophil	Innate
CXCR2	Neutrophil	Innate
TNFRSF10C	Neutrophil	Innate
VNN3	Neutrophil	Innate
CBX6	Plasmacytoid dendritic cell	Innate
DAB2	Plasmacytoid dendritic cell	Innate
DDX17	Plasmacytoid dendritic cell	Innate
HIGD1A	Plasmacytoid dendritic cell	Innate
IDH3A	Plasmacytoid dendritic cell	Innate
IL3RA	Plasmacytoid dendritic cell	Innate
MAGED1	Plasmacytoid dendritic cell	Innate
NUCB2	Plasmacytoid dendritic cell	Innate
OFD1	Plasmacytoid dendritic cell	Innate
OGT	Plasmacytoid dendritic cell	Innate
PDIA4	Plasmacytoid dendritic cell	Innate
SERTAD2	Plasmacytoid dendritic cell	Innate
SIRPA	Plasmacytoid dendritic cell	Innate
TMED2	Plasmacytoid dendritic cell	Innate
ENG	Plasmacytoid dendritic cell	Innate
FCAR	Plasmacytoid dendritic cell	Innate
IGF1	Plasmacytoid dendritic cell	Innate
ITGA2B	Plasmacytoid dendritic cell	Innate
GABARAP	Plasmacytoid dendritic cell	Innate
GPX1	Plasmacytoid dendritic cell	Innate
KRT23	Plasmacytoid dendritic cell	Innate
PROK2	Plasmacytoid dendritic cell	Innate
RALB	Plasmacytoid dendritic cell	Innate
RETNLB	Plasmacytoid dendritic cell	Innate
RNF141	Plasmacytoid dendritic cell	Innate
SEC14L1	Plasmacytoid dendritic cell	Innate
SEPX1	Plasmacytoid dendritic cell	Innate
EMP3	Plasmacytoid dendritic cell	Innate
CD300LF	Plasmacytoid dendritic cell	Innate
ABTB1	Plasmacytoid dendritic cell	Innate
KLHL21	Plasmacytoid dendritic cell	Innate
PHRF1	Plasmacytoid dendritic cell	Innate

## Sheet: Table S2
Table S2. List of the 12 characteristic genes identified by intersecting DEGs, WGCNA module genes, and inflammatory cytokine-related genes.
No.	Gene name
1	RETN
2	RHBDF2
3	GPBAR1
4	GSDMD
5	RELB
6	PSMB10
7	CD19
8	IL12RB1
9	TNFRSF14
10	PPARD
11	CYBA
12	CFP

## Sheet: Table S3
Table S3. GO function were enriched to 346 BP, 22 CC, 24 MF.
ONTOLOGY	ID	Description	BgRatio	pvalue	p.adjust	qvalue	geneID	Count
BP	GO:0046651	lymphocyte proliferation	296/18800	2.69814e-05	2.69814e-05	0.00373231	PSMB10/CD19/IL12RB1/TNFRSF14	4
BP	GO:0032943	mononuclear cell proliferation	300/18800	2.84383e-05	2.84383e-05	0.00373231	PSMB10/CD19/IL12RB1/TNFRSF14	4
BP	GO:0070661	leukocyte proliferation	330/18800	4.1285e-05	4.1285e-05	0.00373231	PSMB10/CD19/IL12RB1/TNFRSF14	4
BP	GO:0090713	immunological memory process	17/18800	5.05254e-05	5.05254e-05	0.00373231	IL12RB1/TNFRSF14	2
BP	GO:0042742	defense response to bacterium	364/18800	6.05068e-05	6.05068e-05	0.00373231	GSDMD/TNFRSF14/CYBA/CFP	4
BP	GO:0046631	alpha-beta T cell activation	158/18800	0.000121196	0.000121196	0.0062299	RELB/IL12RB1/TNFRSF14	3
BP	GO:0001819	positive regulation of cytokine production	475/18800	0.000169525	0.000169525	0.00746929	GSDMD/IL12RB1/TNFRSF14/CYBA	4
BP	GO:0002285	lymphocyte activation involved in immune response	201/18800	0.000246693	0.000246693	0.00883054	RELB/CD19/IL12RB1	3
BP	GO:0042098	T cell proliferation	204/18800	0.000257683	0.000257683	0.00883054	PSMB10/IL12RB1/TNFRSF14	3
BP	GO:0042088	T-helper 1 type immune response	45/18800	0.000364161	0.000364161	0.0112315	RELB/IL12RB1	2
BP	GO:0002366	leukocyte activation involved in immune response	285/18800	0.000685279	0.000685279	0.014241	RELB/CD19/IL12RB1	3
BP	GO:0002263	cell activation involved in immune response	289/18800	0.000713614	0.000713614	0.014241	RELB/CD19/IL12RB1	3
BP	GO:0014823	response to activity	65/18800	0.000759698	0.000759698	0.014241	PPARD/CYBA	2
BP	GO:0042093	T-helper cell differentiation	65/18800	0.000759698	0.000759698	0.014241	RELB/IL12RB1	2
BP	GO:0051047	positive regulation of secretion	300/18800	0.00079538	0.00079538	0.014241	RETN/PPARD/CYBA	3
BP	GO:0002294	CD4-positive, alpha-beta T cell differentiation involved in immune response	67/18800	0.000806972	0.000806972	0.014241	RELB/IL12RB1	2
BP	GO:0002287	alpha-beta T cell activation involved in immune response	68/18800	0.000831131	0.000831131	0.014241	RELB/IL12RB1	2
BP	GO:0002293	alpha-beta T cell differentiation involved in immune response	68/18800	0.000831131	0.000831131	0.014241	RELB/IL12RB1	2
BP	GO:0002292	T cell differentiation involved in immune response	76/18800	0.00103688	0.00103688	0.0163063	RELB/IL12RB1	2
BP	GO:0051235	maintenance of location	331/18800	0.0010574	0.0010574	0.0163063	CD19/PPARD/CYBA	3
BP	GO:0051279	regulation of release of sequestered calcium ion into cytosol	80/18800	0.00114803	0.00114803	0.0168609	CD19/CYBA	2
BP	GO:0043367	CD4-positive, alpha-beta T cell differentiation	82/18800	0.00120567	0.00120567	0.0169025	RELB/IL12RB1	2
BP	GO:0050886	endocrine process	85/18800	0.00129469	0.00129469	0.0173613	RETN/CYBA	2
BP	GO:0050829	defense response to Gram-negative bacterium	87/18800	0.00135574	0.00135574	0.0174225	GSDMD/TNFRSF14	2
BP	GO:0002460	adaptive immune response based on somatic recombination of immune receptors built from immunoglobulin superfamily domains	370/18800	0.00145767	0.00145767	0.017983	RELB/CD19/IL12RB1	3
BP	GO:0030098	lymphocyte differentiation	382/18800	0.00159761	0.00159761	0.0182495	RELB/CD19/IL12RB1	3
BP	GO:0050678	regulation of epithelial cell proliferation	382/18800	0.00159761	0.00159761	0.0182495	GPBAR1/PPARD/CYBA	3
BP	GO:0035710	CD4-positive, alpha-beta T cell activation	102/18800	0.00185683	0.00185683	0.0195611	RELB/IL12RB1	2
BP	GO:0010522	regulation of calcium ion transport into cytosol	103/18800	0.00189293	0.00189293	0.0195611	CD19/CYBA	2
BP	GO:0050830	defense response to Gram-positive bacterium	104/18800	0.00192936	0.00192936	0.0195611	GSDMD/TNFRSF14	2
BP	GO:0046634	regulation of alpha-beta T cell activation	105/18800	0.00196612	0.00196612	0.0195611	IL12RB1/TNFRSF14	2
BP	GO:0046632	alpha-beta T cell differentiation	111/18800	0.00219371	0.00219371	0.0211434	RELB/IL12RB1	2
BP	GO:1903131	mononuclear cell differentiation	433/18800	0.0022863	0.0022863	0.021368	RELB/CD19/IL12RB1	3
BP	GO:0002286	T cell activation involved in immune response	116/18800	0.00239249	0.00239249	0.0214425	RELB/IL12RB1	2
BP	GO:0050673	epithelial cell proliferation	443/18800	0.00243993	0.00243993	0.0214425	GPBAR1/PPARD/CYBA	3
BP	GO:0051209	release of sequestered calcium ion into cytosol	121/18800	0.00259951	0.00259951	0.0214425	CD19/CYBA	2
BP	GO:0046887	positive regulation of hormone secretion	122/18800	0.0026419	0.0026419	0.0214425	RETN/PPARD	2
BP	GO:0051283	negative regulation of sequestering of calcium ion	122/18800	0.0026419	0.0026419	0.0214425	CD19/CYBA	2
BP	GO:0051282	regulation of sequestering of calcium ion	124/18800	0.00272766	0.00272766	0.0215709	CD19/CYBA	2
BP	GO:0051208	sequestering of calcium ion	128/18800	0.00290309	0.00290309	0.0223844	CD19/CYBA	2
BP	GO:0009991	response to extracellular stimulus	479/18800	0.00304603	0.00304603	0.0226449	GSDMD/PPARD/CYBA	3
BP	GO:0071333	cellular response to glucose stimulus	132/18800	0.00308373	0.00308373	0.0226449	PPARD/CYBA	2
BP	GO:0071331	cellular response to hexose stimulus	134/18800	0.00317599	0.00317599	0.0227801	PPARD/CYBA	2
BP	GO:0071326	cellular response to monosaccharide stimulus	136/18800	0.00326955	0.00326955	0.0229181	PPARD/CYBA	2
BP	GO:0071322	cellular response to carbohydrate stimulus	147/18800	0.00380708	0.00380708	0.026093	PPARD/CYBA	2
BP	GO:0045834	positive regulation of lipid metabolic process	153/18800	0.00411655	0.00411655	0.0263735	CD19/PPARD	2
BP	GO:0001678	cellular glucose homeostasis	154/18800	0.00416924	0.00416924	0.0263735	PPARD/CYBA	2
BP	GO:0097553	calcium ion transmembrane import into cytosol	154/18800	0.00416924	0.00416924	0.0263735	CD19/CYBA	2
BP	GO:1905952	regulation of lipid localization	155/18800	0.00422224	0.00422224	0.0263735	RETN/PPARD	2
BP	GO:1903169	regulation of calcium ion transmembrane transport	156/18800	0.00427556	0.00427556	0.0263735	CD19/CYBA	2
BP	GO:0048660	regulation of smooth muscle cell proliferation	170/18800	0.00505496	0.00505496	0.0290587	PPARD/CYBA	2
BP	GO:0060402	calcium ion transport into cytosol	171/18800	0.00511297	0.00511297	0.0290587	CD19/CYBA	2
BP	GO:0048659	smooth muscle cell proliferation	173/18800	0.00522991	0.00522991	0.0290587	PPARD/CYBA	2
BP	GO:0042129	regulation of T cell proliferation	174/18800	0.00528885	0.00528885	0.0290587	IL12RB1/TNFRSF14	2
BP	GO:0050777	negative regulation of immune response	179/18800	0.00558817	0.00558817	0.0290587	RHBDF2/TNFRSF14	2
BP	GO:0050728	negative regulation of inflammatory response	182/18800	0.00577145	0.00577145	0.0290587	RHBDF2/PPARD	2
BP	GO:0002819	regulation of adaptive immune response	188/18800	0.00614626	0.00614626	0.0290587	IL12RB1/TNFRSF14	2
BP	GO:0009749	response to glucose	189/18800	0.00620979	0.00620979	0.0290587	PPARD/CYBA	2
BP	GO:0060401	cytosolic calcium ion transport	190/18800	0.00627363	0.00627363	0.0290587	CD19/CYBA	2
BP	GO:0003093	regulation of glomerular filtration	10/18800	0.0063662	0.0063662	0.0290587	CYBA	1
BP	GO:1905941	positive regulation of gonad development	10/18800	0.0063662	0.0063662	0.0290587	RETN	1
BP	GO:2000288	positive regulation of myoblast proliferation	10/18800	0.0063662	0.0063662	0.0290587	PPARD	1
BP	GO:0009746	response to hexose	193/18800	0.00646696	0.00646696	0.0290587	PPARD/CYBA	2
BP	GO:0034284	response to monosaccharide	200/18800	0.00692864	0.00692864	0.0290587	PPARD/CYBA	2
BP	GO:0009612	response to mechanical stimulus	201/18800	0.00699579	0.00699579	0.0290587	RETN/CYBA	2
BP	GO:0010887	negative regulation of cholesterol storage	11/18800	0.00700077	0.00700077	0.0290587	PPARD	1
BP	GO:0033860	regulation of NAD(P)H oxidase activity	11/18800	0.00700077	0.00700077	0.0290587	CYBA	1
BP	GO:0051673	membrane disruption in another organism	11/18800	0.00700077	0.00700077	0.0290587	GSDMD	1
BP	GO:0001553	luteinization	12/18800	0.00763497	0.00763497	0.0290587	RETN	1
BP	GO:0010455	positive regulation of cell fate commitment	12/18800	0.00763497	0.00763497	0.0290587	IL12RB1	1
BP	GO:0014842	regulation of skeletal muscle satellite cell proliferation	12/18800	0.00763497	0.00763497	0.0290587	PPARD	1
BP	GO:0032966	negative regulation of collagen biosynthetic process	12/18800	0.00763497	0.00763497	0.0290587	PPARD	1
BP	GO:0034135	regulation of toll-like receptor 2 signaling pathway	12/18800	0.00763497	0.00763497	0.0290587	CYBA	1
BP	GO:0038183	bile acid signaling pathway	12/18800	0.00763497	0.00763497	0.0290587	GPBAR1	1
BP	GO:0043380	regulation of memory T cell differentiation	12/18800	0.00763497	0.00763497	0.0290587	IL12RB1	1
BP	GO:0048521	negative regulation of behavior	12/18800	0.00763497	0.00763497	0.0290587	RETN	1
BP	GO:0070254	mucus secretion	12/18800	0.00763497	0.00763497	0.0290587	CYBA	1
BP	GO:0050679	positive regulation of epithelial cell proliferation	211/18800	0.00768376	0.00768376	0.0290587	GPBAR1/CYBA	2
BP	GO:0051651	maintenance of location in cell	219/18800	0.00825547	0.00825547	0.0290587	CD19/CYBA	2
BP	GO:0003084	positive regulation of systemic arterial blood pressure	13/18800	0.0082688	0.0082688	0.0290587	CYBA	1
BP	GO:0010713	negative regulation of collagen metabolic process	13/18800	0.0082688	0.0082688	0.0290587	PPARD	1
BP	GO:0014857	regulation of skeletal muscle cell proliferation	13/18800	0.0082688	0.0082688	0.0290587	PPARD	1
BP	GO:0043379	memory T cell differentiation	13/18800	0.0082688	0.0082688	0.0290587	IL12RB1	1
BP	GO:0046642	negative regulation of alpha-beta T cell proliferation	13/18800	0.0082688	0.0082688	0.0290587	TNFRSF14	1
BP	GO:0072540	T-helper 17 cell lineage commitment	13/18800	0.0082688	0.0082688	0.0290587	IL12RB1	1
BP	GO:1900426	positive regulation of defense response to bacterium	13/18800	0.0082688	0.0082688	0.0290587	CYBA	1
BP	GO:0050870	positive regulation of T cell activation	223/18800	0.00854837	0.00854837	0.0290587	IL12RB1/TNFRSF14	2
BP	GO:0009743	response to carbohydrate	226/18800	0.00877112	0.00877112	0.0290587	PPARD/CYBA	2
BP	GO:0014841	skeletal muscle satellite cell proliferation	14/18800	0.00890225	0.00890225	0.0290587	PPARD	1
BP	GO:0032688	negative regulation of interferon-beta production	14/18800	0.00890225	0.00890225	0.0290587	RELB	1
BP	GO:0090715	immunological memory formation process	14/18800	0.00890225	0.00890225	0.0290587	IL12RB1	1
BP	GO:1905939	regulation of gonad development	14/18800	0.00890225	0.00890225	0.0290587	RETN	1
BP	GO:2000318	positive regulation of T-helper 17 type immune response	14/18800	0.00890225	0.00890225	0.0290587	IL12RB1	1
BP	GO:0071356	cellular response to tumor necrosis factor	229/18800	0.00899648	0.00899648	0.0290587	TNFRSF14/CYBA	2
BP	GO:0050670	regulation of lymphocyte proliferation	230/18800	0.00907218	0.00907218	0.0290587	IL12RB1/TNFRSF14	2
BP	GO:0046883	regulation of hormone secretion	231/18800	0.00914817	0.00914817	0.0290587	RETN/PPARD	2
BP	GO:0032944	regulation of mononuclear cell proliferation	233/18800	0.00930102	0.00930102	0.0290587	IL12RB1/TNFRSF14	2
BP	GO:0033002	muscle cell proliferation	233/18800	0.00930102	0.00930102	0.0290587	PPARD/CYBA	2
BP	GO:0001977	renal system process involved in regulation of blood volume	15/18800	0.00953534	0.00953534	0.0290587	CYBA	1
BP	GO:0014856	skeletal muscle cell proliferation	15/18800	0.00953534	0.00953534	0.0290587	PPARD	1
BP	GO:0046321	positive regulation of fatty acid oxidation	15/18800	0.00953534	0.00953534	0.0290587	PPARD	1
BP	GO:0045444	fat cell differentiation	237/18800	0.00961019	0.00961019	0.0290587	RETN/PPARD	2
BP	GO:0042593	glucose homeostasis	244/18800	0.0101623	0.0101623	0.0296301	PPARD/CYBA	2
BP	GO:0033500	carbohydrate homeostasis	245/18800	0.0102423	0.0102423	0.0296301	PPARD/CYBA	2
BP	GO:1903039	positive regulation of leukocyte cell-cell adhesion	245/18800	0.0102423	0.0102423	0.0296301	IL12RB1/TNFRSF14	2
BP	GO:0002699	positive regulation of immune effector process	248/18800	0.010484	0.010484	0.0296301	IL12RB1/TNFRSF14	2
BP	GO:0034612	response to tumor necrosis factor	249/18800	0.0105652	0.0105652	0.0296301	TNFRSF14/CYBA	2
BP	GO:0051924	regulation of calcium ion transport	251/18800	0.0107283	0.0107283	0.0296301	CD19/CYBA	2
BP	GO:0002295	T-helper cell lineage commitment	17/18800	0.0108004	0.0108004	0.0296301	IL12RB1	1
BP	GO:0033189	response to vitamin A	17/18800	0.0108004	0.0108004	0.0296301	PPARD	1
BP	GO:0034134	toll-like receptor 2 signaling pathway	17/18800	0.0108004	0.0108004	0.0296301	CYBA	1
BP	GO:0050708	regulation of protein secretion	252/18800	0.0108103	0.0108103	0.0296301	RHBDF2/PPARD	2
BP	GO:0070663	regulation of leukocyte proliferation	254/18800	0.0109751	0.0109751	0.0296301	IL12RB1/TNFRSF14	2
BP	GO:0045927	positive regulation of growth	256/18800	0.0111411	0.0111411	0.0296301	PPARD/CYBA	2
BP	GO:0002827	positive regulation of T-helper 1 type immune response	18/18800	0.0114324	0.0114324	0.0296301	IL12RB1	1
BP	GO:0006957	complement activation, alternative pathway	18/18800	0.0114324	0.0114324	0.0296301	CFP	1
BP	GO:0050665	hydrogen peroxide biosynthetic process	18/18800	0.0114324	0.0114324	0.0296301	CYBA	1
BP	GO:2000319	regulation of T-helper 17 cell differentiation	18/18800	0.0114324	0.0114324	0.0296301	IL12RB1	1
BP	GO:2000831	regulation of steroid hormone secretion	18/18800	0.0114324	0.0114324	0.0296301	RETN	1
BP	GO:0030217	T cell differentiation	263/18800	0.0117308	0.0117308	0.0298924	RELB/IL12RB1	2
BP	GO:0010885	regulation of cholesterol storage	19/18800	0.012064	0.012064	0.0298924	PPARD	1
BP	GO:0032930	positive regulation of superoxide anion generation	19/18800	0.012064	0.012064	0.0298924	CYBA	1
BP	GO:0051546	keratinocyte migration	19/18800	0.012064	0.012064	0.0298924	PPARD	1
BP	GO:1902894	negative regulation of miRNA transcription	19/18800	0.012064	0.012064	0.0298924	PPARD	1
BP	GO:0031348	negative regulation of defense response	268/18800	0.0121604	0.0121604	0.0298924	RHBDF2/PPARD	2
BP	GO:1903532	positive regulation of secretion by cell	274/18800	0.0126851	0.0126851	0.0298924	RETN/PPARD	2
BP	GO:0043011	myeloid dendritic cell differentiation	20/18800	0.0126952	0.0126952	0.0298924	RELB	1
BP	GO:0043373	CD4-positive, alpha-beta T cell lineage commitment	20/18800	0.0126952	0.0126952	0.0298924	IL12RB1	1
BP	GO:0046931	pore complex assembly	20/18800	0.0126952	0.0126952	0.0298924	GSDMD	1
BP	GO:1900424	regulation of defense response to bacterium	20/18800	0.0126952	0.0126952	0.0298924	CYBA	1
BP	GO:0046879	hormone secretion	281/18800	0.0133097	0.0133097	0.0298924	RETN/PPARD	2
BP	GO:0010878	cholesterol storage	21/18800	0.0133261	0.0133261	0.0298924	PPARD	1
BP	GO:0045063	T-helper 1 cell differentiation	21/18800	0.0133261	0.0133261	0.0298924	RELB	1
BP	GO:2000291	regulation of myoblast proliferation	21/18800	0.0133261	0.0133261	0.0298924	PPARD	1
BP	GO:0001666	response to hypoxia	286/18800	0.013764	0.013764	0.0298924	PPARD/CYBA	2
BP	GO:0002363	alpha-beta T cell lineage commitment	22/18800	0.0139566	0.0139566	0.0298924	IL12RB1	1
BP	GO:0010888	negative regulation of lipid storage	22/18800	0.0139566	0.0139566	0.0298924	PPARD	1
BP	GO:0032928	regulation of superoxide anion generation	22/18800	0.0139566	0.0139566	0.0298924	CYBA	1
BP	GO:0035929	steroid hormone secretion	22/18800	0.0139566	0.0139566	0.0298924	RETN	1
BP	GO:0043369	CD4-positive or CD8-positive, alpha-beta T cell lineage commitment	22/18800	0.0139566	0.0139566	0.0298924	IL12RB1	1
BP	GO:0045624	positive regulation of T-helper cell differentiation	22/18800	0.0139566	0.0139566	0.0298924	IL12RB1	1
BP	GO:0070269	pyroptosis	22/18800	0.0139566	0.0139566	0.0298924	GSDMD	1
BP	GO:1903428	positive regulation of reactive oxygen species biosynthetic process	22/18800	0.0139566	0.0139566	0.0298924	CYBA	1
BP	GO:2000810	regulation of bicellular tight junction assembly	22/18800	0.0139566	0.0139566	0.0298924	GPBAR1	1
BP	GO:0009914	hormone transport	290/18800	0.0141324	0.0141324	0.0300502	RETN/PPARD	2
BP	GO:0022409	positive regulation of cell-cell adhesion	291/18800	0.0142251	0.0142251	0.0300502	IL12RB1/TNFRSF14	2
BP	GO:0046697	decidualization	23/18800	0.0145867	0.0145867	0.0306044	PPARD	1
BP	GO:0048511	rhythmic process	297/18800	0.0147873	0.0147873	0.0308157	RETN/RELB	2
BP	GO:0036293	response to decreased oxygen levels	299/18800	0.0149769	0.0149769	0.0310013	PPARD/CYBA	2
BP	GO:0003081	regulation of systemic arterial blood pressure by renin-angiotensin	24/18800	0.0152165	0.0152165	0.03108	CYBA	1
BP	GO:0050855	regulation of B cell receptor signaling pathway	24/18800	0.0152165	0.0152165	0.03108	CD19	1
BP	GO:0003071	renal system process involved in regulation of systemic arterial blood pressure	25/18800	0.0158459	0.0158459	0.0315156	CYBA	1
BP	GO:0035821	modulation of process of another organism	25/18800	0.0158459	0.0158459	0.0315156	GSDMD	1
BP	GO:0045662	negative regulation of myoblast differentiation	25/18800	0.0158459	0.0158459	0.0315156	PPARD	1
BP	GO:0051450	myoblast proliferation	25/18800	0.0158459	0.0158459	0.0315156	PPARD	1
BP	GO:0071496	cellular response to external stimulus	309/18800	0.0159406	0.0159406	0.0315156	GSDMD/CYBA	2
BP	GO:0070588	calcium ion transmembrane transport	314/18800	0.0164324	0.0164324	0.0315602	CD19/CYBA	2
BP	GO:0003094	glomerular filtration	26/18800	0.0164749	0.0164749	0.0315602	CYBA	1
BP	GO:0060259	regulation of feeding behavior	26/18800	0.0164749	0.0164749	0.0315602	RETN	1
BP	GO:1904385	cellular response to angiotensin	26/18800	0.0164749	0.0164749	0.0315602	CYBA	1
BP	GO:2000316	regulation of T-helper 17 type immune response	26/18800	0.0164749	0.0164749	0.0315602	IL12RB1	1
BP	GO:0006959	humoral immune response	317/18800	0.0167307	0.0167307	0.0317957	PSMB10/CFP	2
BP	GO:0035774	positive regulation of insulin secretion involved in cellular response to glucose stimulus	27/18800	0.0171035	0.0171035	0.0317957	PPARD	1
BP	GO:0097205	renal filtration	27/18800	0.0171035	0.0171035	0.0317957	CYBA	1
BP	GO:0071214	cellular response to abiotic stimulus	323/18800	0.0173341	0.0173341	0.0317957	RELB/CYBA	2
BP	GO:0104004	cellular response to environmental stimulus	323/18800	0.0173341	0.0173341	0.0317957	RELB/CYBA	2
BP	GO:0070482	response to oxygen levels	324/18800	0.0174356	0.0174356	0.0317957	PPARD/CYBA	2
BP	GO:0007204	positive regulation of cytosolic calcium ion concentration	325/18800	0.0175374	0.0175374	0.0317957	CD19/CYBA	2
BP	GO:0002360	T cell lineage commitment	28/18800	0.0177318	0.0177318	0.0317957	IL12RB1	1
BP	GO:0034123	positive regulation of toll-like receptor signaling pathway	28/18800	0.0177318	0.0177318	0.0317957	CYBA	1
BP	GO:0042104	positive regulation of activated T cell proliferation	28/18800	0.0177318	0.0177318	0.0317957	IL12RB1	1
BP	GO:0072539	T-helper 17 cell differentiation	28/18800	0.0177318	0.0177318	0.0317957	IL12RB1	1
BP	GO:0048545	response to steroid hormone	330/18800	0.01805	0.01805	0.0321734	PPARD/CYBA	2
BP	GO:0001773	myeloid dendritic cell activation	29/18800	0.0183597	0.0183597	0.0321734	RELB	1
BP	GO:0002825	regulation of T-helper 1 type immune response	29/18800	0.0183597	0.0183597	0.0321734	IL12RB1	1
BP	GO:0010453	regulation of cell fate commitment	29/18800	0.0183597	0.0183597	0.0321734	IL12RB1	1
BP	GO:0001916	positive regulation of T cell mediated cytotoxicity	30/18800	0.0189873	0.0189873	0.0323419	IL12RB1	1
BP	GO:0071480	cellular response to gamma radiation	30/18800	0.0189873	0.0189873	0.0323419	CYBA	1
BP	GO:1990776	response to angiotensin	30/18800	0.0189873	0.0189873	0.0323419	CYBA	1
BP	GO:0019216	regulation of lipid metabolic process	339/18800	0.0189889	0.0189889	0.0323419	CD19/PPARD	2
BP	GO:0050863	regulation of T cell activation	342/18800	0.0193065	0.0193065	0.0323419	IL12RB1/TNFRSF14	2
BP	GO:1903037	regulation of leukocyte cell-cell adhesion	344/18800	0.0195195	0.0195195	0.0323419	IL12RB1/TNFRSF14	2
BP	GO:0002230	positive regulation of defense response to virus by host	31/18800	0.0196145	0.0196145	0.0323419	IL12RB1	1
BP	GO:0002862	negative regulation of inflammatory response to antigenic stimulus	31/18800	0.0196145	0.0196145	0.0323419	RHBDF2	1
BP	GO:2000406	positive regulation of T cell migration	31/18800	0.0196145	0.0196145	0.0323419	TNFRSF14	1
BP	GO:0009306	protein secretion	350/18800	0.0201644	0.0201644	0.0323419	RHBDF2/PPARD	2
BP	GO:0032480	negative regulation of type I interferon production	32/18800	0.0202413	0.0202413	0.0323419	RELB	1
BP	GO:0043372	positive regulation of CD4-positive, alpha-beta T cell differentiation	32/18800	0.0202413	0.0202413	0.0323419	IL12RB1	1
BP	GO:0045684	positive regulation of epidermis development	32/18800	0.0202413	0.0202413	0.0323419	PPARD	1
BP	GO:0046320	regulation of fatty acid oxidation	32/18800	0.0202413	0.0202413	0.0323419	PPARD	1
BP	GO:0051385	response to mineralocorticoid	32/18800	0.0202413	0.0202413	0.0323419	CYBA	1
BP	GO:0002831	regulation of response to biotic stimulus	351/18800	0.0202728	0.0202728	0.0323419	IL12RB1/CYBA	2
BP	GO:0035592	establishment of protein localization to extracellular region	351/18800	0.0202728	0.0202728	0.0323419	RHBDF2/PPARD	2
BP	GO:1904062	regulation of cation transmembrane transport	352/18800	0.0203815	0.0203815	0.0323419	CD19/CYBA	2
BP	GO:0002697	regulation of immune effector process	353/18800	0.0204903	0.0204903	0.0323419	IL12RB1/TNFRSF14	2
BP	GO:0051480	regulation of cytosolic calcium ion concentration	356/18800	0.0208185	0.0208185	0.0323419	CD19/CYBA	2
BP	GO:0001893	maternal placenta development	33/18800	0.0208677	0.0208677	0.0323419	PPARD	1
BP	GO:0043552	positive regulation of phosphatidylinositol 3-kinase activity	33/18800	0.0208677	0.0208677	0.0323419	CD19	1
BP	GO:0098801	regulation of renal system process	33/18800	0.0208677	0.0208677	0.0323419	CYBA	1
BP	GO:0071692	protein localization to extracellular region	359/18800	0.0211488	0.0211488	0.0326137	RHBDF2/PPARD	2
BP	GO:0002335	mature B cell differentiation	34/18800	0.0214938	0.0214938	0.0328175	CD19	1
BP	GO:0090322	regulation of superoxide metabolic process	34/18800	0.0214938	0.0214938	0.0328175	CYBA	1
BP	GO:0002449	lymphocyte mediated immunity	365/18800	0.0218163	0.0218163	0.0331458	CD19/IL12RB1	2
BP	GO:0044060	regulation of endocrine process	35/18800	0.0221195	0.0221195	0.0334418	RETN	1
BP	GO:0051251	positive regulation of lymphocyte activation	371/18800	0.0224926	0.0224926	0.0337259	IL12RB1/TNFRSF14	2
BP	GO:0017004	cytochrome complex assembly	36/18800	0.0227448	0.0227448	0.0337259	CYBA	1
BP	GO:0043368	positive T cell selection	36/18800	0.0227448	0.0227448	0.0337259	IL12RB1	1
BP	GO:0045777	positive regulation of blood pressure	36/18800	0.0227448	0.0227448	0.0337259	CYBA	1
BP	GO:0045730	respiratory burst	37/18800	0.0233698	0.0233698	0.0339971	CYBA	1
BP	GO:0046640	regulation of alpha-beta T cell proliferation	37/18800	0.0233698	0.0233698	0.0339971	TNFRSF14	1
BP	GO:0090218	positive regulation of lipid kinase activity	37/18800	0.0233698	0.0233698	0.0339971	CD19	1
BP	GO:2000403	positive regulation of lymphocyte migration	37/18800	0.0233698	0.0233698	0.0339971	TNFRSF14	1
BP	GO:0007159	leukocyte cell-cell adhesion	381/18800	0.0236394	0.0236394	0.0339971	IL12RB1/TNFRSF14	2
BP	GO:0001990	regulation of systemic arterial blood pressure by hormone	38/18800	0.0239944	0.0239944	0.0339971	CYBA	1
BP	GO:0032965	regulation of collagen biosynthetic process	38/18800	0.0239944	0.0239944	0.0339971	PPARD	1
BP	GO:0043403	skeletal muscle tissue regeneration	38/18800	0.0239944	0.0239944	0.0339971	PPARD	1
BP	GO:0045622	regulation of T-helper cell differentiation	38/18800	0.0239944	0.0239944	0.0339971	IL12RB1	1
BP	GO:0002253	activation of immune response	386/18800	0.0242218	0.0242218	0.0339971	CD19/CFP	2
BP	GO:0014912	negative regulation of smooth muscle cell migration	39/18800	0.0246187	0.0246187	0.0339971	PPARD	1
BP	GO:0032941	secretion by tissue	39/18800	0.0246187	0.0246187	0.0339971	CYBA	1
BP	GO:0045923	positive regulation of fatty acid metabolic process	39/18800	0.0246187	0.0246187	0.0339971	PPARD	1
BP	GO:0071470	cellular response to osmotic stress	39/18800	0.0246187	0.0246187	0.0339971	RELB	1
BP	GO:2000516	positive regulation of CD4-positive, alpha-beta T cell activation	39/18800	0.0246187	0.0246187	0.0339971	IL12RB1	1
BP	GO:0006869	lipid transport	391/18800	0.0248103	0.0248103	0.0339971	RETN/PPARD	2
BP	GO:0050727	regulation of inflammatory response	394/18800	0.0251662	0.0251662	0.0339971	RHBDF2/PPARD	2
BP	GO:0001914	regulation of T cell mediated cytotoxicity	40/18800	0.0252425	0.0252425	0.0339971	IL12RB1	1
BP	GO:0046633	alpha-beta T cell proliferation	40/18800	0.0252425	0.0252425	0.0339971	TNFRSF14	1
BP	GO:0051281	positive regulation of release of sequestered calcium ion into cytosol	40/18800	0.0252425	0.0252425	0.0339971	CD19	1
BP	GO:0072538	T-helper 17 type immune response	40/18800	0.0252425	0.0252425	0.0339971	IL12RB1	1
BP	GO:0010959	regulation of metal ion transport	403/18800	0.0262469	0.0262469	0.0350636	CD19/CYBA	2
BP	GO:0043434	response to peptide hormone	404/18800	0.0263681	0.0263681	0.0350636	RETN/CYBA	2
BP	GO:0046636	negative regulation of alpha-beta T cell activation	42/18800	0.0264892	0.0264892	0.0350636	TNFRSF14	1
BP	GO:0050691	regulation of defense response to virus by host	42/18800	0.0264892	0.0264892	0.0350636	IL12RB1	1
BP	GO:0006775	fat-soluble vitamin metabolic process	43/18800	0.027112	0.027112	0.0352823	PPARD	1
BP	GO:0010712	regulation of collagen metabolic process	43/18800	0.027112	0.027112	0.0352823	PPARD	1
BP	GO:0042554	superoxide anion generation	43/18800	0.027112	0.027112	0.0352823	CYBA	1
BP	GO:0140353	lipid export from cell	43/18800	0.027112	0.027112	0.0352823	RETN	1
BP	GO:0001558	regulation of cell growth	415/18800	0.0277173	0.0277173	0.0356411	PPARD/CYBA	2
BP	GO:0062208	positive regulation of pattern recognition receptor signaling pathway	44/18800	0.0277344	0.0277344	0.0356411	CYBA	1
BP	GO:2000404	regulation of T cell migration	44/18800	0.0277344	0.0277344	0.0356411	TNFRSF14	1
BP	GO:0002861	regulation of inflammatory response to antigenic stimulus	45/18800	0.0283565	0.0283565	0.0358336	RHBDF2	1
BP	GO:0031295	T cell costimulation	45/18800	0.0283565	0.0283565	0.0358336	TNFRSF14	1
BP	GO:0046006	regulation of activated T cell proliferation	45/18800	0.0283565	0.0283565	0.0358336	IL12RB1	1
BP	GO:0060612	adipose tissue development	45/18800	0.0283565	0.0283565	0.0358336	PPARD	1
BP	GO:0002696	positive regulation of leukocyte activation	421/18800	0.0284651	0.0284651	0.0358336	IL12RB1/TNFRSF14	2
BP	GO:0006816	calcium ion transport	424/18800	0.028842	0.028842	0.0360265	CD19/CYBA	2
BP	GO:0002683	negative regulation of immune system process	425/18800	0.0289682	0.0289682	0.0360265	RHBDF2/TNFRSF14	2
BP	GO:0032102	negative regulation of response to external stimulus	429/18800	0.0294749	0.0294749	0.0360265	RHBDF2/PPARD	2
BP	GO:0031294	lymphocyte costimulation	47/18800	0.0295995	0.0295995	0.0360265	TNFRSF14	1
BP	GO:0032964	collagen biosynthetic process	47/18800	0.0295995	0.0295995	0.0360265	PPARD	1
BP	GO:0043616	keratinocyte proliferation	47/18800	0.0295995	0.0295995	0.0360265	PPARD	1
BP	GO:0097028	dendritic cell differentiation	47/18800	0.0295995	0.0295995	0.0360265	RELB	1
BP	GO:1905953	negative regulation of lipid localization	47/18800	0.0295995	0.0295995	0.0360265	PPARD	1
BP	GO:0048608	reproductive structure development	433/18800	0.0299853	0.0299853	0.0360265	RETN/PPARD	2
BP	GO:0003044	regulation of systemic arterial blood pressure mediated by a chemical signal	48/18800	0.0302204	0.0302204	0.0360265	CYBA	1
BP	GO:0042311	vasodilation	48/18800	0.0302204	0.0302204	0.0360265	PPARD	1
BP	GO:0050798	activated T cell proliferation	48/18800	0.0302204	0.0302204	0.0360265	IL12RB1	1
BP	GO:1903426	regulation of reactive oxygen species biosynthetic process	48/18800	0.0302204	0.0302204	0.0360265	CYBA	1
BP	GO:0050867	positive regulation of cell activation	436/18800	0.0303705	0.0303705	0.0360265	IL12RB1/TNFRSF14	2
BP	GO:0061458	reproductive system development	436/18800	0.0303705	0.0303705	0.0360265	RETN/PPARD	2
BP	GO:0022602	ovulation cycle process	49/18800	0.030841	0.030841	0.0361674	RETN	1
BP	GO:0045058	T cell selection	49/18800	0.030841	0.030841	0.0361674	IL12RB1	1
BP	GO:0060986	endocrine hormone secretion	49/18800	0.030841	0.030841	0.0361674	RETN	1
BP	GO:0001913	T cell mediated cytotoxicity	50/18800	0.0314612	0.0314612	0.0361755	IL12RB1	1
BP	GO:0043370	regulation of CD4-positive, alpha-beta T cell differentiation	50/18800	0.0314612	0.0314612	0.0361755	IL12RB1	1
BP	GO:0046638	positive regulation of alpha-beta T cell differentiation	50/18800	0.0314612	0.0314612	0.0361755	IL12RB1	1
BP	GO:0061178	regulation of insulin secretion involved in cellular response to glucose stimulus	50/18800	0.0314612	0.0314612	0.0361755	PPARD	1
BP	GO:0010876	lipid localization	446/18800	0.031669	0.031669	0.0361755	RETN/PPARD	2
BP	GO:0031667	response to nutrient levels	446/18800	0.031669	0.031669	0.0361755	PPARD/CYBA	2
BP	GO:0045785	positive regulation of cell adhesion	446/18800	0.031669	0.031669	0.0361755	IL12RB1/TNFRSF14	2
BP	GO:0023061	signal release	451/18800	0.0323267	0.0323267	0.0367905	RETN/PPARD	2
BP	GO:0006874	cellular calcium ion homeostasis	456/18800	0.0329898	0.0329898	0.0372702	CD19/CYBA	2
BP	GO:0022407	regulation of cell-cell adhesion	456/18800	0.0329898	0.0329898	0.0372702	IL12RB1/TNFRSF14	2
BP	GO:0002443	leukocyte mediated immunity	457/18800	0.0331231	0.0331231	0.0372842	CD19/IL12RB1	2
BP	GO:0010524	positive regulation of calcium ion transport into cytosol	54/18800	0.0339385	0.0339385	0.0379252	CD19	1
BP	GO:0045661	regulation of myoblast differentiation	54/18800	0.0339385	0.0339385	0.0379252	PPARD	1
BP	GO:0010883	regulation of lipid storage	55/18800	0.0345569	0.0345569	0.0382528	PPARD	1
BP	GO:0042743	hydrogen peroxide metabolic process	55/18800	0.0345569	0.0345569	0.0382528	CYBA	1
BP	GO:0055074	calcium ion homeostasis	468/18800	0.0346038	0.0346038	0.0382528	CD19/CYBA	2
BP	GO:0010332	response to gamma radiation	56/18800	0.035175	0.035175	0.0387341	CYBA	1
BP	GO:0034765	regulation of ion transmembrane transport	476/18800	0.0356971	0.0356971	0.0387341	CD19/CYBA	2
BP	GO:0007566	embryo implantation	57/18800	0.0357927	0.0357927	0.0387341	PPARD	1
BP	GO:0032608	interferon-beta production	57/18800	0.0357927	0.0357927	0.0387341	RELB	1
BP	GO:0032648	regulation of interferon-beta production	57/18800	0.0357927	0.0357927	0.0387341	RELB	1
BP	GO:0043551	regulation of phosphatidylinositol 3-kinase activity	57/18800	0.0357927	0.0357927	0.0387341	CD19	1
BP	GO:0001912	positive regulation of leukocyte mediated cytotoxicity	58/18800	0.03641	0.03641	0.03877	IL12RB1	1
BP	GO:0060135	maternal process involved in female pregnancy	58/18800	0.03641	0.03641	0.03877	PPARD	1
BP	GO:0002764	immune response-regulating signaling pathway	482/18800	0.0365261	0.0365261	0.03877	CD19/CYBA	2
BP	GO:0016049	cell growth	484/18800	0.0368041	0.0368041	0.03877	PPARD/CYBA	2
BP	GO:0002711	positive regulation of T cell mediated immunity	59/18800	0.0370269	0.0370269	0.03877	IL12RB1	1
BP	GO:0002820	negative regulation of adaptive immune response	59/18800	0.0370269	0.0370269	0.03877	TNFRSF14	1
BP	GO:0035773	insulin secretion involved in cellular response to glucose stimulus	59/18800	0.0370269	0.0370269	0.03877	PPARD	1
BP	GO:0051353	positive regulation of oxidoreductase activity	59/18800	0.0370269	0.0370269	0.03877	CYBA	1
BP	GO:1902893	regulation of miRNA transcription	59/18800	0.0370269	0.0370269	0.03877	PPARD	1
BP	GO:0019221	cytokine-mediated signaling pathway	486/18800	0.037083	0.037083	0.03877	IL12RB1/TNFRSF14	2
BP	GO:0061614	miRNA transcription	60/18800	0.0376435	0.0376435	0.0392232	PPARD	1
BP	GO:1901652	response to peptide	491/18800	0.0377838	0.0377838	0.0392368	RETN/CYBA	2
BP	GO:0006091	generation of precursor metabolites and energy	494/18800	0.0382069	0.0382069	0.0392938	PPARD/CYBA	2
BP	GO:0072503	cellular divalent inorganic cation homeostasis	494/18800	0.0382069	0.0382069	0.0392938	CD19/CYBA	2
BP	GO:1903409	reactive oxygen species biosynthetic process	61/18800	0.0382598	0.0382598	0.0392938	CYBA	1
BP	GO:0051223	regulation of protein transport	495/18800	0.0383483	0.0383483	0.0392938	RHBDF2/PPARD	2
BP	GO:0010817	regulation of hormone levels	496/18800	0.03849	0.03849	0.0393083	RETN/PPARD	2
BP	GO:0032731	positive regulation of interleukin-1 beta production	62/18800	0.0388757	0.0388757	0.0395712	GSDMD	1
BP	GO:2000401	regulation of lymphocyte migration	63/18800	0.0394912	0.0394912	0.0400655	TNFRSF14	1
BP	GO:0031343	positive regulation of cell killing	65/18800	0.0407211	0.0407211	0.0410433	IL12RB1	1
BP	GO:0045682	regulation of epidermis development	65/18800	0.0407211	0.0407211	0.0410433	PPARD	1
BP	GO:0050854	regulation of antigen receptor-mediated signaling pathway	66/18800	0.0413355	0.0413355	0.0412581	CD19	1
BP	GO:0071677	positive regulation of mononuclear cell migration	66/18800	0.0413355	0.0413355	0.0412581	TNFRSF14	1
BP	GO:2000514	regulation of CD4-positive, alpha-beta T cell activation	66/18800	0.0413355	0.0413355	0.0412581	IL12RB1	1
BP	GO:0032024	positive regulation of insulin secretion	67/18800	0.0419496	0.0419496	0.0413359	PPARD	1
BP	GO:0045600	positive regulation of fat cell differentiation	67/18800	0.0419496	0.0419496	0.0413359	PPARD	1
BP	GO:0046637	regulation of alpha-beta T cell differentiation	67/18800	0.0419496	0.0419496	0.0413359	IL12RB1	1
BP	GO:0072678	T cell migration	67/18800	0.0419496	0.0419496	0.0413359	TNFRSF14	1
BP	GO:0002720	positive regulation of cytokine production involved in immune response	68/18800	0.0425633	0.0425633	0.0413559	TNFRSF14	1
BP	GO:0042130	negative regulation of T cell proliferation	68/18800	0.0425633	0.0425633	0.0413559	TNFRSF14	1
BP	GO:0050709	negative regulation of protein secretion	68/18800	0.0425633	0.0425633	0.0413559	RHBDF2	1
BP	GO:0032370	positive regulation of lipid transport	69/18800	0.0431767	0.0431767	0.0413559	RETN	1
BP	GO:0032922	circadian regulation of gene expression	69/18800	0.0431767	0.0431767	0.0413559	RELB	1
BP	GO:0043550	regulation of lipid kinase activity	69/18800	0.0431767	0.0431767	0.0413559	CD19	1
BP	GO:0046635	positive regulation of alpha-beta T cell activation	69/18800	0.0431767	0.0431767	0.0413559	IL12RB1	1
BP	GO:0050795	regulation of behavior	69/18800	0.0431767	0.0431767	0.0413559	RETN	1
BP	GO:0070830	bicellular tight junction assembly	69/18800	0.0431767	0.0431767	0.0413559	GPBAR1	1
BP	GO:0042698	ovulation cycle	70/18800	0.0437897	0.0437897	0.0416841	RETN	1
BP	GO:0071260	cellular response to mechanical stimulus	70/18800	0.0437897	0.0437897	0.0416841	CYBA	1
BP	GO:0050766	positive regulation of phagocytosis	71/18800	0.0444023	0.0444023	0.0418795	CYBA	1
BP	GO:1904427	positive regulation of calcium ion transmembrane transport	71/18800	0.0444023	0.0444023	0.0418795	CD19	1
BP	GO:2000379	positive regulation of reactive oxygen species metabolic process	71/18800	0.0444023	0.0444023	0.0418795	CYBA	1
BP	GO:0006801	superoxide metabolic process	72/18800	0.0450146	0.0450146	0.042071	CYBA	1
BP	GO:0014855	striated muscle cell proliferation	72/18800	0.0450146	0.0450146	0.042071	PPARD	1
BP	GO:0042246	tissue regeneration	72/18800	0.0450146	0.0450146	0.042071	PPARD	1
BP	GO:0032732	positive regulation of interleukin-1 production	73/18800	0.0456265	0.0456265	0.0422587	GSDMD	1
BP	GO:0042058	regulation of epidermal growth factor receptor signaling pathway	73/18800	0.0456265	0.0456265	0.0422587	RHBDF2	1
BP	GO:0048662	negative regulation of smooth muscle cell proliferation	73/18800	0.0456265	0.0456265	0.0422587	PPARD	1
BP	GO:0050688	regulation of defense response to virus	74/18800	0.046238	0.046238	0.0426969	IL12RB1	1
BP	GO:0002437	inflammatory response to antigenic stimulus	75/18800	0.0468492	0.0468492	0.0427493	RHBDF2	1
BP	GO:0071230	cellular response to amino acid stimulus	75/18800	0.0468492	0.0468492	0.0427493	CYBA	1
BP	GO:0071479	cellular response to ionizing radiation	75/18800	0.0468492	0.0468492	0.0427493	CYBA	1
BP	GO:0120192	tight junction assembly	75/18800	0.0468492	0.0468492	0.0427493	GPBAR1	1
BP	GO:0006635	fatty acid beta-oxidation	76/18800	0.04746	0.04746	0.043052	PPARD	1
BP	GO:0034121	regulation of toll-like receptor signaling pathway	76/18800	0.04746	0.04746	0.043052	CYBA	1
BP	GO:0032729	positive regulation of interferon-gamma production	77/18800	0.0480705	0.0480705	0.0433507	IL12RB1	1
BP	GO:0043297	apical junction assembly	77/18800	0.0480705	0.0480705	0.0433507	GPBAR1	1
BP	GO:0006970	response to osmotic stress	79/18800	0.0492904	0.0492904	0.0440643	RELB	1
BP	GO:0014068	positive regulation of phosphatidylinositol 3-kinase signaling	79/18800	0.0492904	0.0492904	0.0440643	PPARD	1
BP	GO:1901184	regulation of ERBB signaling pathway	79/18800	0.0492904	0.0492904	0.0440643	RHBDF2	1
BP	GO:0006029	proteoglycan metabolic process	80/18800	0.0498998	0.0498998	0.0444802	PPARD	1
CC	GO:0042581	specific granule	160/19594	2.01434e-06	2.01434e-06	5.51293e-05	RETN/GSDMD/CYBA/CFP	4
CC	GO:0035580	specific granule lumen	62/19594	6.50366e-06	6.50366e-06	8.89975e-05	RETN/GSDMD/CFP	3
CC	GO:0070820	tertiary granule	164/19594	0.000119822	0.000119822	0.00109311	GSDMD/CYBA/CFP	3
CC	GO:1904724	tertiary granule lumen	55/19594	0.000501468	0.000501468	0.0034311	GSDMD/CFP	2
CC	GO:0034774	secretory granule lumen	322/19594	0.000866475	0.000866475	0.00354236	RETN/GSDMD/CFP	3
CC	GO:0060205	cytoplasmic vesicle lumen	325/19594	0.000890071	0.000890071	0.00354236	RETN/GSDMD/CFP	3
CC	GO:0031983	vesicle lumen	327/19594	0.000906028	0.000906028	0.00354236	RETN/GSDMD/CFP	3
CC	GO:0009897	external side of plasma membrane	455/19594	0.00234085	0.00234085	0.00800817	CD19/IL12RB1/TNFRSF14	3
CC	GO:0019774	proteasome core complex, beta-subunit complex	11/19594	0.00671787	0.00671787	0.0204286	PSMB10	1
CC	GO:0043020	NADPH oxidase complex	14/19594	0.00854283	0.00854283	0.0233804	CYBA	1
CC	GO:0061702	inflammasome complex	18/19594	0.0109713	0.0109713	0.0269244	GSDMD	1
CC	GO:0005839	proteasome core complex	20/19594	0.0121835	0.0121835	0.0269244	PSMB10	1
CC	GO:0097038	perinuclear endoplasmic reticulum	21/19594	0.0127891	0.0127891	0.0269244	CYBA	1
CC	GO:0000502	proteasome complex	59/19594	0.0355509	0.0355509	0.0588876	PSMB10	1
CC	GO:0001725	stress fiber	69/19594	0.0414603	0.0414603	0.0588876	CYBA	1
CC	GO:0097517	contractile actin filament bundle	69/19594	0.0414603	0.0414603	0.0588876	CYBA	1
CC	GO:0070821	tertiary granule membrane	73/19594	0.0438148	0.0438148	0.0588876	CYBA	1
CC	GO:0017053	transcription repressor complex	76/19594	0.0455772	0.0455772	0.0588876	RELB	1
CC	GO:0030670	phagocytic vesicle membrane	77/19594	0.046164	0.046164	0.0588876	CYBA	1
CC	GO:0042641	actomyosin	77/19594	0.046164	0.046164	0.0588876	CYBA	1
CC	GO:0032432	actin filament bundle	78/19594	0.0467504	0.0467504	0.0588876	CYBA	1
CC	GO:1905369	endopeptidase complex	79/19594	0.0473366	0.0473366	0.0588876	PSMB10	1
MF	GO:0019955	cytokine binding	141/18410	0.00306159	0.00306159	0.0302838	IL12RB1/TNFRSF14	2
MF	GO:0005031	tumor necrosis factor-activated receptor activity	10/18410	0.00596043	0.00596043	0.0302838	TNFRSF14	1
MF	GO:0016175	superoxide-generating NAD(P)H oxidase activity	10/18410	0.00596043	0.00596043	0.0302838	CYBA	1
MF	GO:1901612	cardiolipin binding	11/18410	0.00655469	0.00655469	0.0302838	GSDMD	1
MF	GO:0005035	death receptor activity	13/18410	0.00774225	0.00774225	0.0302838	TNFRSF14	1
MF	GO:0004298	threonine-type endopeptidase activity	14/18410	0.00833554	0.00833554	0.0302838	PSMB10	1
MF	GO:0036041	long-chain fatty acid binding	15/18410	0.00892851	0.00892851	0.0302838	PPARD	1
MF	GO:0050664	oxidoreductase activity, acting on NAD(P)H, oxygen as acceptor	15/18410	0.00892851	0.00892851	0.0302838	CYBA	1
MF	GO:1901611	phosphatidylglycerol binding	15/18410	0.00892851	0.00892851	0.0302838	GSDMD	1
MF	GO:0070300	phosphatidic acid binding	20/18410	0.0118885	0.0118885	0.036252	GSDMD	1
MF	GO:0003707	nuclear steroid receptor activity	24/18410	0.0142508	0.0142508	0.036252	PPARD	1
MF	GO:0070003	threonine-type peptidase activity	24/18410	0.0142508	0.0142508	0.036252	PSMB10	1
MF	GO:0070273	phosphatidylinositol-4-phosphate binding	29/18410	0.0171963	0.0171963	0.0373893	GSDMD	1
MF	GO:0051059	NF-kappaB binding	31/18410	0.0183723	0.0183723	0.0373893	PPARD	1
MF	GO:0140318	protein transporter activity	31/18410	0.0183723	0.0183723	0.0373893	RHBDF2	1
MF	GO:0001223	transcription coactivator binding	40/18410	0.0236485	0.0236485	0.0451188	PPARD	1
MF	GO:0005504	fatty acid binding	49/18410	0.0288988	0.0288988	0.0492328	PPARD	1
MF	GO:0004879	nuclear receptor activity	52/18410	0.0306432	0.0306432	0.0492328	PPARD	1
MF	GO:0098531	ligand-activated transcription factor activity	52/18410	0.0306432	0.0306432	0.0492328	PPARD	1
MF	GO:0001786	phosphatidylserine binding	60/18410	0.035281	0.035281	0.0538499	GSDMD	1
MF	GO:0001618	virus receptor activity	76/18410	0.0444961	0.0444961	0.0609651	TNFRSF14	1
MF	GO:0140272	exogenous protein binding	77/18410	0.0450694	0.0450694	0.0609651	TNFRSF14	1
MF	GO:0033293	monocarboxylic acid binding	81/18410	0.0473594	0.0473594	0.0609651	PPARD	1
MF	GO:0005546	phosphatidylinositol-4,5-bisphosphate binding	82/18410	0.0479311	0.0479311	0.0609651	GSDMD	1

## Sheet: Table S4
Table S4. KEGG pathway were enriched to 7 pathway.
ID	Description	GeneRatio	BgRatio	pvalue	p.adjust	qvalue	geneID	Count
hsa04380	Osteoclast differentiation	45697	128/8190	0.0081202	0.0081202	0.122787	RELB/CYBA	2
hsa04621	NOD-like receptor signaling pathway	45697	184/8190	0.0162899	0.0162899	0.122787	GSDMD/CYBA	2
hsa04613	Neutrophil extracellular trap formation	45697	190/8190	0.017313	0.017313	0.122787	GSDMD/CYBA	2
hsa05169	Epstein-Barr virus infection	45697	202/8190	0.0194412	0.0194412	0.122787	RELB/CD19	2
hsa04060	Cytokine-cytokine receptor interaction	45697	295/8190	0.039375	0.039375	0.157664	IL12RB1/TNFRSF14	2
hsa05340	Primary immunodeficiency	45666	38/8190	0.0410112	0.0410112	0.157664	CD19	1
hsa03050	Proteasome	45666	46/8190	0.0494522	0.0494522	0.157664	PSMB10	1

## Sheet: Table S5
Table S5. The four candidate hub genes selected for downstream analyses.
No.	Gene name
1	CD19
2	RELB
3	IL12RB1
4	TNFRSF14

## Sheet: Table S6
Table S6. Predicted Drug–Target Interactions for CD19, RELB, IL12RB1, and RETN.
Gene Name	Chemical Name	Chemical ID	CAS RN	Interaction Count	Organism Count
CD19	bisphenol A	C006780	1980-5-7	3	2
CD19	Diethylhexyl Phthalate	D004051	117-81-7	3	2
CD19	Silicon Dioxide	D012822	7631-86-9	3	3
CD19	1,2-Dimethylhydrazine	D019813	540-73-8	2	2
CD19	Benzo(a)pyrene	D001564	50-32-8	2	2
RELB	Cisplatin	D002945	15663-27-1	91	2
RELB	Tetrachlorodibenzodioxin	D013749	1746-01-6	28	4
RELB	Oxygen	D010100	7782-44-7	12	2
RELB	Benzo(a)pyrene	D001564	50-32-8	9	2
RELB	Cannabidiol	D002185	13956-29-1	6	2
IL12RB1	Benzo(a)pyrene	D001564	50-32-8	5	2
IL12RB1	bisphenol A	C006780	1980-5-7	3	3
IL12RB1	pirinixic acid	C006253	50892-23-4	3	1
IL12RB1	Tetrachlorodibenzodioxin	D013749	1746-01-6	3	2
IL12RB1	Tetradecanoylphorbol Acetate	D013755	16561-29-8	3	1
RETN	Tretinoin	D014212	302-79-4	12	2
RETN	Sodium Glutamate	D012970	142-47-2	11	1
RETN	bisphenol A	C006780	1980-5-7	7	3
RETN	Cadmium Chloride	D019256	10108-64-2	7	2
RETN	Estradiol	D004958	50-28-2	7	3

## Sheet: Table S7
Table S7. Leading-edge genes driving enrichment of the HSV-1 infection–related gene set
Candidate gene	NES	EnrichmentScore	NES	pvalue	p.adjust	geneID
CD19	0.283874	1.34314	0.000691495	0.0251243	0.0211088	ZNF860/TLR9/TNF/ZNF563/HLA-DOB/ZNF726/ZIK1/TRAF2/ZNF33A/TNFRSF14/ZNF90/FADD/POU2F2/NECTIN1/IL6/SRSF8/TNFRSF1A/ZNF778/ZNF135/ZNF324/ITGA5/ZNF132/TYK2/ZNF786/ZNF155/ZNF814/HLA-DQA1/ZNF667/ZNF559/ZNF112/CCL5/MYD88/PILRA/ZNF841/TRAF5/EIF2AK1/HLA-DOA/ZNF763/ZNF682/CFP/ZNF746/ZNF256/ZNF160/ZNF317/TAB2/NFKBIA/IFNGR2/HLA-DPB1/ZNF316/ZNF519/IRAK1/BIRC2/ZNF780B/ZNF595/ZNF783/TRADD/ZSCAN32/ZNF154/HLA-DRB1/Z…
IL12RB1	0.313867	1.38269	2.01208e-06	6.9305e-05	4.82429e-05	ZNF212/TNFRSF14/ZNF33A/ZNF14/ZNF891/ZNF20/TAB2/ZNF486/ZNF600/SRSF9/MAVS/ALYREF/ZNF436/SRSF4/ZNF426/ZNF136/ZNF689/ITGA5/NECTIN1/FADD/ZNF324/PIK3CD/ZNF783/ZNF350/ZNF551/TNFRSF1A/ZNF671/ZNF543/ZNF688/SRSF3/ZNF77/B2M/ZNF441/SRSF1/ZNF853/ZNF506/ZNF621/ZNF132/IRAK4/ZNF737/ZNF8/POU2F2/ZNF786/ZNF264/TRAF6/PILRA/ZNF416/ZNF211/CASP8/ZNF589/TAP1/EIF2B2/ZNF224/ZNF708/ZNF417/AKT3/ZNF700/ZNF347/BAX/ZNF805/HCFC…
RELB	0.320338	1.45136	8.30142e-07	0.000262325	0.000220206	TLR9/ZNF132/NECTIN1/TNFRSF14/TNFRSF1A/ZNF688/ZNF547/TNFSF14/ZNF486/ZNF169/ZNF563/SOCS3/FADD/CCL5/ZNF607/ZNF211/POU2F2/TAB2/PIK3CD/ZFP82/ZNF763/ZNF484/ZNF324B/TAP1/ZNF331/ZNF674/ZNF701/SRSF7/IL1B/ZNF773/ZNF33B/ZNF225/ZNF436/ZNF658/ZNF558/ZNF230/BAX/TRAF2/CFP/ZNF468/ZNF681/ZNF77/ZNF182/ZNF140/ZNF57/ZNF561/ZNF205/ZNF273/ZNF780B/ZNF200/ZNF33A/ZNF337/ITGA5/ZNF662/ZNF443/ZNF37A/ZNF616/ZNF17/IRAK4/ZNF78…
RETN	0.321419	1.37745	2.0525e-05	0.0066501	0.00650318	ZNF28/ZFP57/ZNF43/ZNF177/CCL2/HLA-A/ZNF440/NFKB1/ZNF613/IFNG/ZNF558/ZNF559-ZNF177/ZNF749/ZNF432/ZNF724/ZNF225/FASLG/ZNF845/ZNF684/ZNF527/ZNF273/PIK3R3/ZNF879/ZNF234/ZNF461/ZNF799/ZNF823/ZNF442/HLA-F/ZNF620/ZNF343/ZNF124/ZNF596/ZNF77/ZNF623/ZNF624/ZNF420/ZNF184/POU2F1/ZNF226/ZNF605/ZNF680/BST2/ZNF257/RELA/OAS2/ZNF141/ZNF17/IL12A/ZNF554/HCFC1/ZNF506/RBAK/ZNF431/BAK1/PIK3CB/ZNF484/ZNF627/ZNF583/DAXX…
